# Supplementary material for: Supercapacitor Electrodes: Is Nickel Foam the Right Substrate for Active Materials?
Source: MDPI journal article supplement (doi:10.3390/ma17061292), 2024-03-11
Supplement: s1 [file s1]

# Supplementary

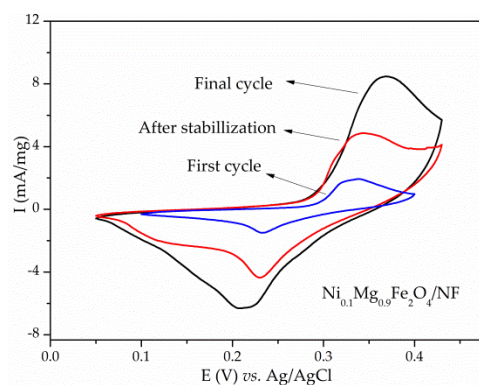

(a)

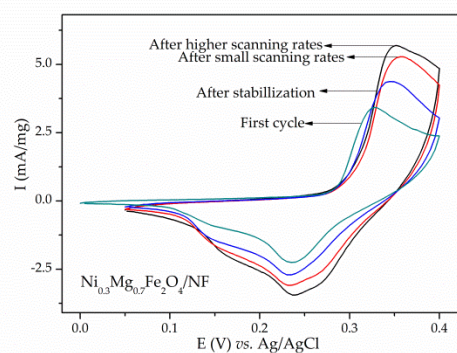

(b)

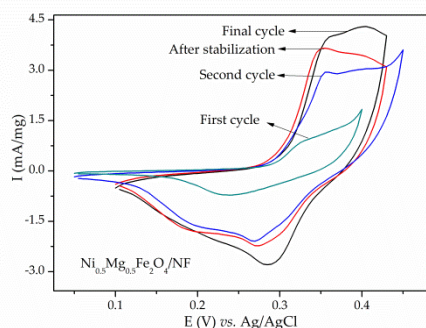

(c)

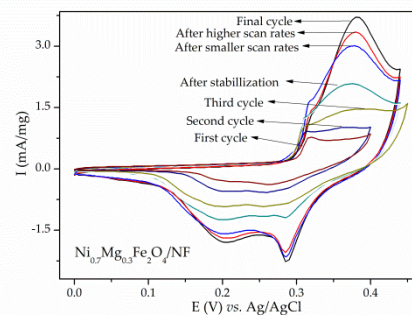

(d)

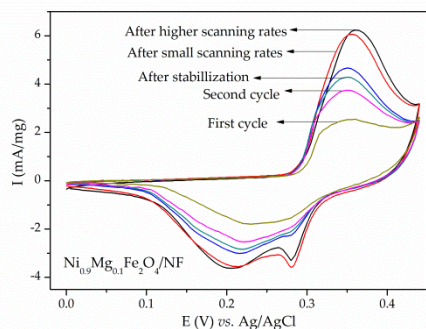

(e)

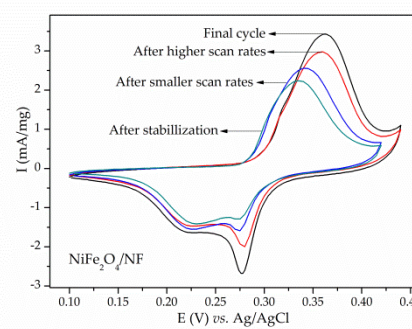

(f)

**Figure S1** CVs of  $\text{Mg}_x\text{Ni}_{1-x}\text{Fe}_2\text{O}_4$  with  $x$  being 0.1, 0.3, 0.5, 0.7, 0.9, and 1.0 a-f, respectively, in 3 M KOH
